# Supplementary material for: Na0.3WO3nanorods: a multifunctional agent for in vivo dual-model imaging and photothermal therapy of cancer cells
Source: Royal Society of Chemistry journal article supplement (doi:10.1039/c4dt02927e), 2014-11-19
Supplement: c4dt02927e1.pdf [file c4dt02927e1.pdf]

## Supporting Information

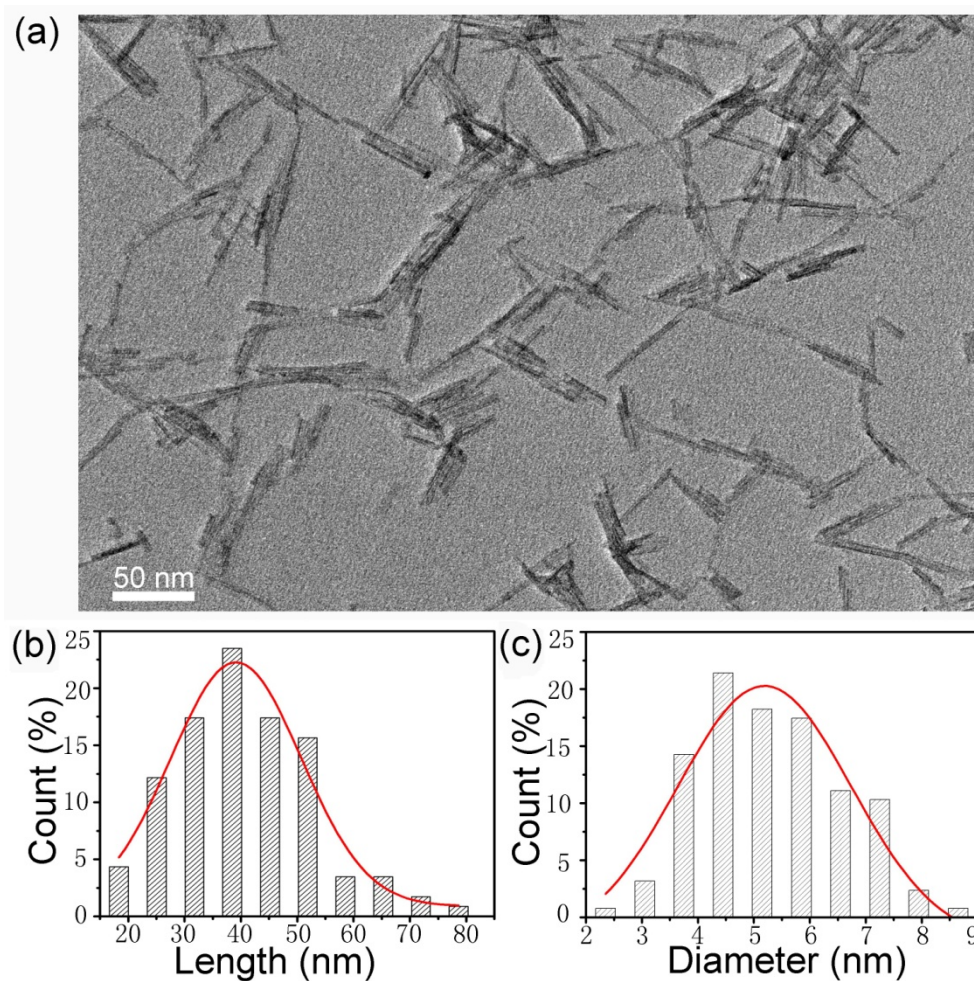

**Fig.S1 (a)The TEM image of the PEGylated Na<sub>0.3</sub>WO<sub>3</sub> nanorods; Size histograms represent the dimension distribution of the PEGylated Na<sub>0.3</sub>WO<sub>3</sub> nanorods in length (b) and diameter (c), respectively.**

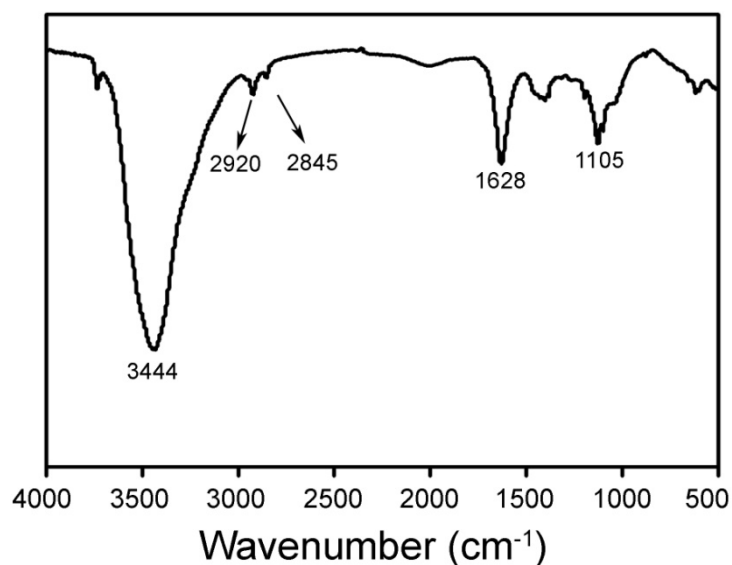

**Fig. S2** FTIR spectra of the PEGylated Na<sub>0.3</sub>WO<sub>3</sub> nanorods

Due to the O-H stretching vibration of adsorbed water and/or PEG-400, the sample exhibits a broad band at about 3444 cm<sup>-1</sup>. The 2920 and 2845 cm<sup>-1</sup> transmission bands are respectively assigned to the asymmetric ( $\nu_{as}$ ) and symmetric ( $\nu_s$ ) stretching vibrations of methylene (CH<sub>2</sub>) units in PEG-400 chain. The bands at 1628 cm<sup>-1</sup> should be related to the bending modes of the hydroxyls of adsorbed water. The band at around 1105 cm<sup>-1</sup> is corresponding to C-O stretching vibration coordinating to metal cations, which agreed well with the IR spectrum of pure PEG-400. These results revealed that there are PEG-400 ligands on the surface of the Na<sub>0.3</sub>WO<sub>3</sub> nanorods, suggesting the formation of PEGylated Na<sub>0.3</sub>WO<sub>3</sub> nanorods.

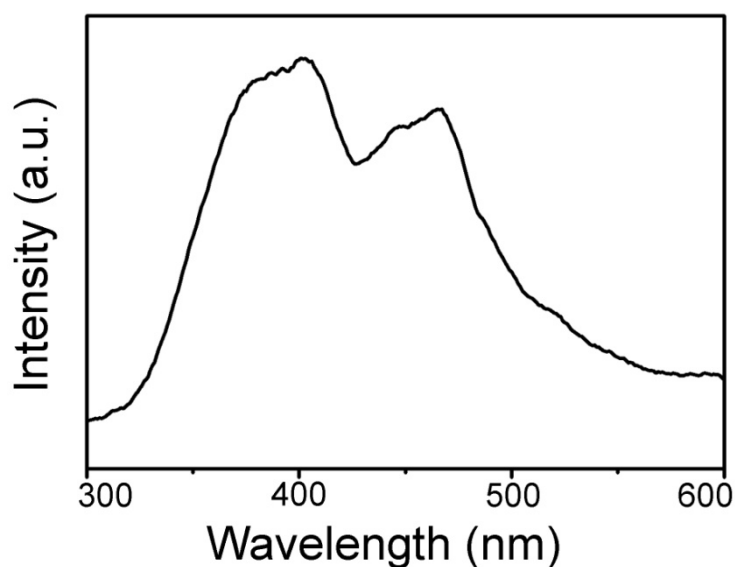

**Fig.S3** photoluminescence spectrum of the PEGylated Na<sub>0.3</sub>WO<sub>3</sub> nanorods

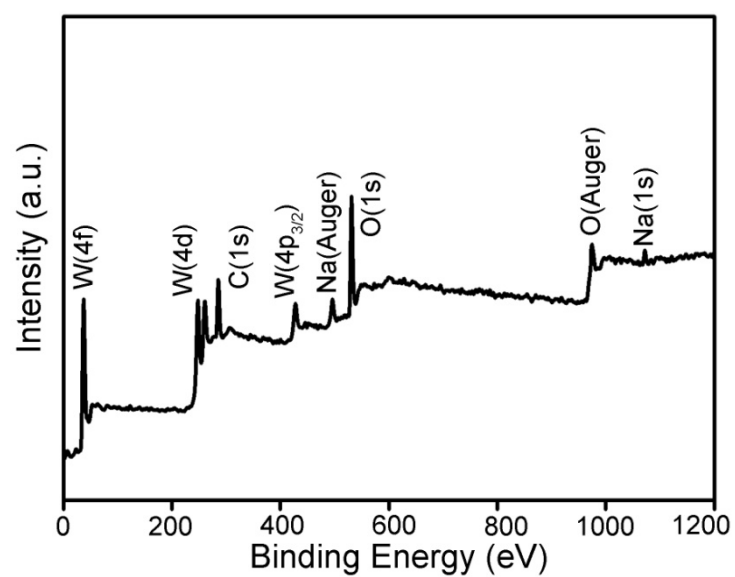

**Fig. S4** XPS survey spectrum of the PEGylated Na<sub>0.3</sub>WO<sub>3</sub> nanorods

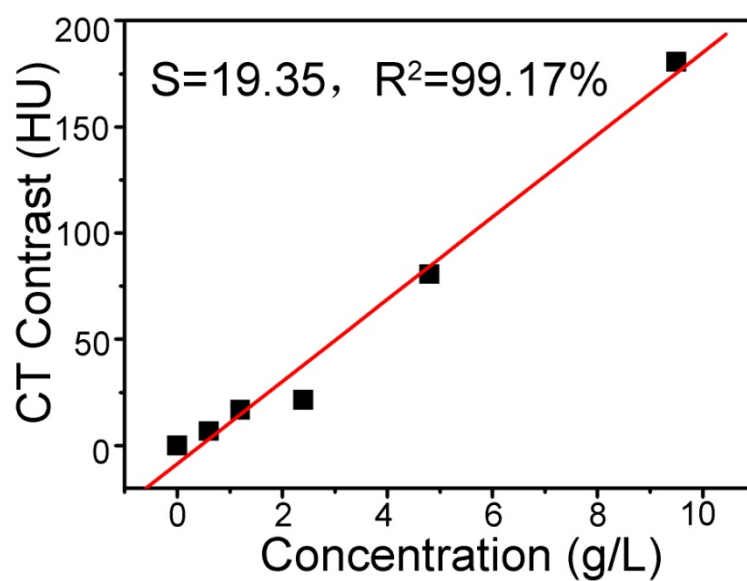

**Fig.S5** HU values of iopamidol as the function of its concentrations

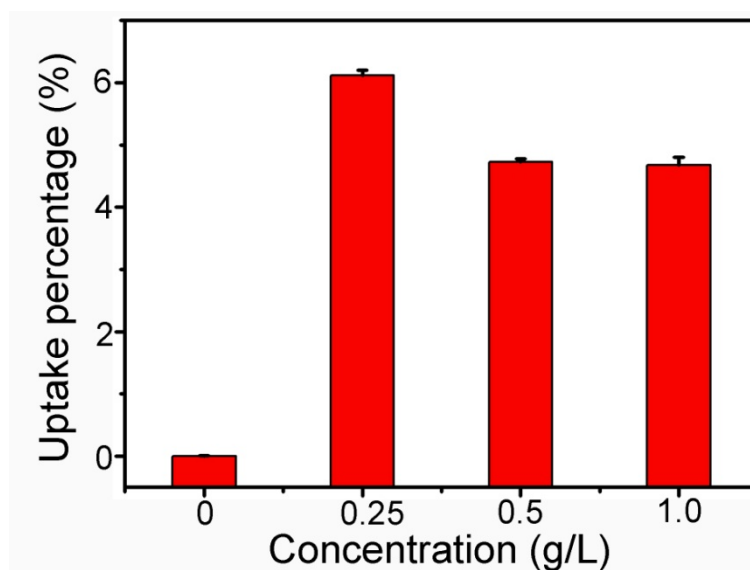

**Fig. S6** Cellular uptake percentage of the  $\text{Na}_{0.3}\text{WO}_3$  nanorods in vitro cells treated with the  $\text{Na}_{0.3}\text{WO}_3$  nanorods with different concentrations.

We have calculated the cell uptake percentage of the hydrophilic  $\text{Na}_{0.3}\text{WO}_3$  nanorods with different concentrations (0, 0.25, 0.5, 1.0 g/L). As shown in Fig. S6, the cellular uptake percentage is nearly 6.2% when the concentration is 0.25 g/L. However, the cellular uptake percentage declined with the increase of concentration, because the cell viability dropped at the same time. An average percentage can reach to ~ 5%. Compared with silica modified Pd nanosheets (~ 1.3%),<sup>1</sup> the cellular uptake efficiency of the hydrophilic  $\text{Na}_{0.3}\text{WO}_3$  nanorods was almost 4 times higher than the former. Thus, it is believed that the hydrophilic  $\text{Na}_{0.3}\text{WO}_3$  nanorods have high cell uptake efficiency and can be a promising candidate for an efficient drug carrying system.

#### Reference

- 1 S. H. Tang, X. Q. Huang, N. F. Zheng, *Chem. Commun.* 2011, 47,3948.

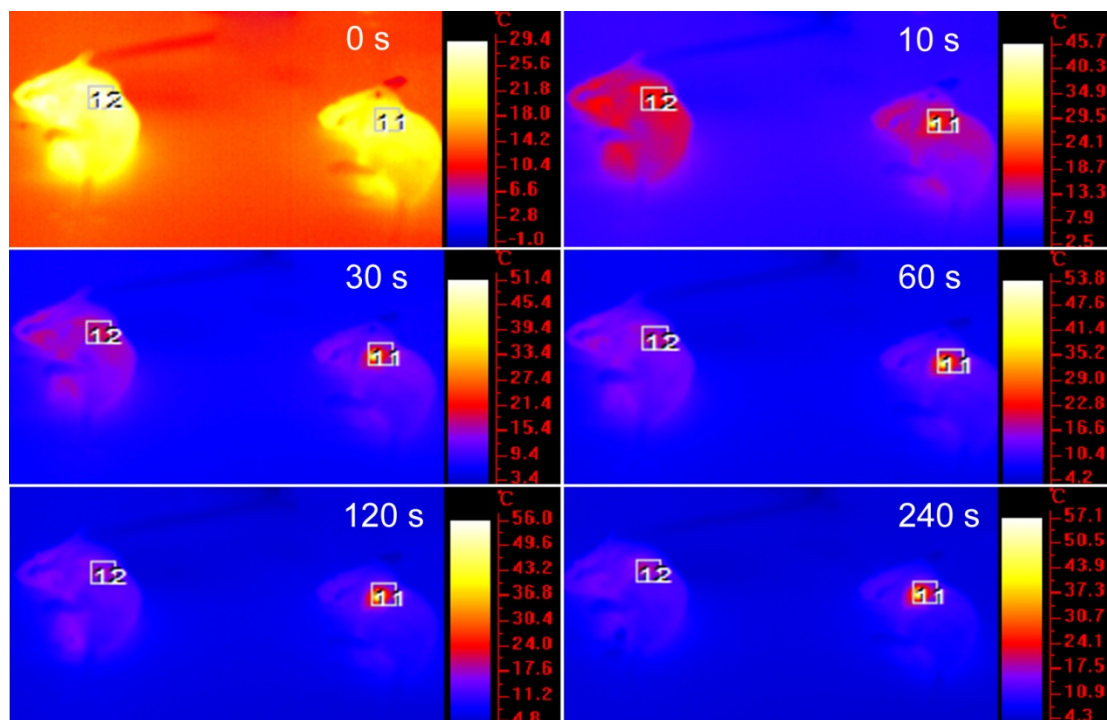

**Fig. S7** The full-body thermographic images of mice containing tumors which were injected with saline solution (left mouse, indicated region 12) and saline solution containing PEGylated  $\text{Na}_{0.3}\text{WO}_3$  nanorods (right mouse, indicated region 11), under the irradiation of 915-nm laser with the safe density of  $1.2 \text{ Wcm}^{-2}$  for different time (0-240 s).
